# Supplementary material for: Characterization of the interleukin-17 effect on articular cartilage in a translational model: an explorative study
Source: PubMed Central journal article supplement (PMC7216541; doi:10.1186/s41927-020-00122-x), 2020-05-12

## Day 14

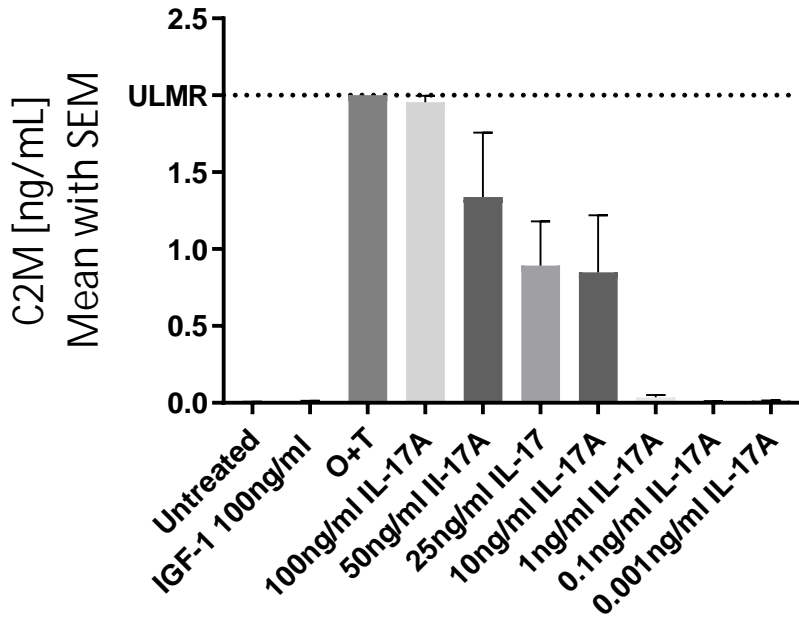

Supplement: 41927_2020_122_MOESM1_ESM.pdf [file 41927_2020_122_MOESM1_ESM.pdf]
